# Supplementary material for: Relations between harmonic frequencies of diatomic molecules
Source: Royal Society of Chemistry journal article supplement (doi:10.1039/c2cp43630b), 2012-11-20
Supplement: c2cp43630b.pdf [file c2cp43630b.pdf]

## Supplementary data

### Contents

**Table S1** Harmonic frequencies from atomic spring constants for the ground states of alkali-metal diatomic molecules.

**Table S2** Harmonic frequencies for the  $a^3\Sigma^+/a^3\Sigma_u^+$ ,  $b^3\Pi/b^3\Pi_u$ , and  $A^1\Sigma^+/A^1\Sigma_u^+$  excited states of alkali-metal diatomic molecules.

**Table S3** Harmonic frequencies from the  $AB\{AX+BY-XY\}$  and  $AB\{A_2+BC-C_2\}$  schemes for some sets of the ground-state molecules.

**Section S1** Results for molecules from groups IIA & VIA.

**Table S4** Harmonic frequencies obtained from theory of atomic spring constants for the  $X^1\Sigma^+$  states of BeO, BeS, MgO, MgS, CaO, CaS, SrO, SrS, BaO, and BaS.

**Figure S1** Total electronic densities in the ground states of (a).  $Li_2$ ; (b). LiNa; and (c). LiK molecules. The data are calculated using the *Gaussian 03* package<sup>73</sup> at Hartree-Fock/6-311++g(3df,3dp) level. Parameters are the same for different molecules. Resolution=0.1 Å and full density matrixex are used.

**Figure S2** Errors from the  $AB\{AX+BY-XY\}$  schemes with  $(n_B-n_X)\times(n_A-n_Y)=-1$ . All the errors are less than zero in this figure.

**Figure S3** Errors from the  $AB\{AX+BY-XY\}$  schemes with  $(n_B-n_X)\times(n_A-n_Y)=1$ . All the errors are greater than zero in this figure.

**Figure S4** Total electronic densities in the ground states of molecules in (a) {BH, SiH, BF, SiF} and (b) {LiO, LiCl, NaO, NaCl} sets: (a1) BF; (a2) BH; (a3) SiF; (a4) SiH; (b1) NaCl; (b2) LiCl; (b3) NaO; (b4) LiO. The data are calculated using the *Gaussian 03* package<sup>73</sup> at B3LYP/6-311++g(3df,3dp) level. Resolution=0.1 Å. Parameters are the same for different molecules. Full density matrixes are used.

**Section S2** Results for group IB molecules

**Figure S5** Errors for AuCu, AgCu, and AgAu from molecules of group IB atoms and their hydrides

Table S1. Harmonic frequencies from atomic spring constants for the ground states of alkali-metal diatomic molecules. The isotope species are  $^7\text{Li}$ ,  $^{23}\text{Na}$ ,  $^{39}\text{K}$ ,  $^{85}\text{Rb}$ , and  $^{133}\text{Cs}$  in the molecules.

|                 | Experiments               |      | Present work              |                                         |                                 | <i>Ab initio</i>                        |                                 |         |
|-----------------|---------------------------|------|---------------------------|-----------------------------------------|---------------------------------|-----------------------------------------|---------------------------------|---------|
|                 | $\omega_e/\text{cm}^{-1}$ | Ref. | $\omega_e/\text{cm}^{-1}$ | Scheme                                  | $\delta\omega_e/\text{cm}^{-1}$ | $\omega_e/\text{cm}^{-1}$               | $\delta\omega_e/\text{cm}^{-1}$ | Ref.    |
| $\text{Li}_2$   | 351.4066                  | 23   | 358.6788                  | {LiNa-Na <sub>2</sub> }                 | 7.2722                          |                                         |                                 |         |
| $\text{Na}_2$   | 159.0855                  | 23   | 161.2740                  | {LiNa-Li <sub>2</sub> }                 | 2.1885                          |                                         |                                 |         |
| LiNa            | 256.5412                  | 23   | 254.4643                  | {Li <sub>2</sub> +Na <sub>2</sub> }     | -2.0769                         |                                         |                                 |         |
| LiK             | 212.0386                  | 27   | 213.039                   | {LiRb+NaK-NaRb}                         | 1.0004                          | 210.9                                   | -1.14                           | 49      |
|                 |                           |      |                           |                                         |                                 | 219.8                                   | 7.76                            | 27      |
|                 |                           |      |                           |                                         |                                 | 195.0                                   | -0.18                           | 53      |
| LiRb            | 195.1839                  | 28   | 195.8958                  | {LiCs+NaRb-NaCs}                        | 0.7118                          | 194.0                                   | -1.18                           | 57      |
|                 |                           |      |                           |                                         |                                 | 194.3449                                | {LiK+RbNa-Kna}                  | -0.8391 |
| LiCs            | 184.6989                  | 29   | 184.0851                  | {LiRb+NaCs-NaRb}                        | -0.6138                         | 187.1                                   | 2.4                             | 52      |
| NaK             | 124.0229                  | 30   | 123.5423                  | {NaRb+LiK-LiRb}                         | -0.4806                         | 123.44                                  | -0.58                           | 18      |
| NaRb            | 106.856                   | 31   | 106.5332                  | {NaCs+LiRb-LiCs}                        | -0.3228                         | 103.9                                   | -2.96                           | 57      |
|                 |                           |      | 107.2450                  | {NaK+RbLi-Kli}                          | 0.3890                          | 106.0                                   | -0.86                           | 53      |
| NaCs            | 98.87866                  | 32   | 99.15821                  | {NaRb+LiCs-LiRb}                        | 0.2795                          | 99.97                                   | 0.09                            | 52      |
| $\text{K}_2$    | 92.4                      | 25   | 92.75748                  | {KRb-Rb <sub>2</sub> }                  | 0.3575                          | 93.18                                   | 1.22                            | 18      |
|                 |                           |      | 92.7681                   | {KRb*-Rb <sub>2</sub> }                 | 0.3681                          | 91.80                                   | -0.60                           | 49      |
| KRb             | 75.8418                   | 33   | 75.7074                   | {K <sub>2</sub> +Rb <sub>2</sub> }      | -0.1344                         | 76                                      | 0.16                            | 59      |
|                 |                           |      | 75.84577*                 | 69                                      | 76.1234                         | {RbCs+K <sub>2</sub> -Cs <sub>2</sub> } | 0.2816                          | 76.3    |
|                 |                           |      | 76.36                     |                                         |                                 |                                         |                                 | 0.52    |
| KCs             | 68.394                    | 34   | 68.0233                   | {KRb+RbCs-Rb <sub>2</sub> }             | -0.3707                         | 69.21                                   | 0.82                            | 52      |
|                 |                           |      | 68.6678                   | {Cs <sub>2</sub> +NaK-Na <sub>2</sub> } | 0.2738                          | 68.7                                    | 0.31                            | 55      |
|                 |                           |      | 67.5804                   | {Cs <sub>2</sub> +K <sub>2</sub> }      | -0.8136                         | 69.9                                    | 1.51                            | 58      |
|                 |                           |      | 68.0265                   | {KRb*+RbCs-Rb <sub>2</sub> }            | -0.3675                         | 67.2                                    | -1.19                           | 55      |
| Rb <sub>2</sub> | 57.78916                  | 26   | 57.97958                  | {KRb-K <sub>2</sub> }                   | 0.1904                          | 59                                      | 1.21                            | 50      |
|                 |                           |      | 57.47408                  | {KRb+RbCs-KCs}                          | -0.3151                         |                                         |                                 |         |
|                 |                           |      | 57.47683                  | {KRb*+RbCs-KCs}                         | -0.3123                         |                                         |                                 |         |
| RbCs            | 50.01374                  | 35   | 49.78458                  | {Rb <sub>2</sub> +Cs <sub>2</sub> }     | -0.2292                         | 51.35                                   | 1.34                            | 56      |
|                 |                           |      | 50.26695                  | {Rb <sub>2</sub> +KCs-KRb}              | 0.2532                          |                                         |                                 |         |
|                 |                           |      | 49.8587                   | {Cs <sub>2</sub> +KRb-K <sub>2</sub> }  | -0.1550                         |                                         |                                 |         |
|                 |                           |      | 49.8609                   | {Cs <sub>2</sub> +KRb*-K <sub>2</sub> } | -0.1529                         |                                         |                                 |         |
|                 |                           |      | 50.26471                  | {Rb <sub>2</sub> +KCs-KRb*}             | 0.2510                          |                                         |                                 |         |
| $\text{Cs}_2$   | 42.022                    | 24   | 42.37754                  | {RbCs-Rb <sub>2</sub> }                 | 0.3555                          |                                         |                                 |         |

\*  $\omega_e$  from ref.69.

Table S2. Harmonic frequencies for the  $a^3\Sigma^+/a^3\Sigma_u^+$ ,  $b^3\Pi/b^3\Pi_u$ , and  $A^1\Sigma^+/A^1\Sigma_u^+$  excited states of alkali-metal diatomic molecules. The isotope species are  $^7\text{Li}$ ,  $^{23}\text{Na}$ ,  $^{39}\text{K}$ ,  $^{85}\text{Rb}$ , and  $^{133}\text{Cs}$  in the molecules.

| $a^3\Sigma_u^+$ | Experiments               |      | Present                   | Work                            | Scheme                                   | <i>ab initio</i>          |                                 |      |
|-----------------|---------------------------|------|---------------------------|---------------------------------|------------------------------------------|---------------------------|---------------------------------|------|
|                 | $\omega_e/\text{cm}^{-1}$ | Refs | $\omega_e/\text{cm}^{-1}$ | $\delta\omega_e/\text{cm}^{-1}$ |                                          | $\omega_e/\text{cm}^{-1}$ | $\delta\omega_e/\text{cm}^{-1}$ | Refs |
| $\text{Li}_2$   | 65.13                     | 36   |                           |                                 |                                          |                           |                                 |      |
| $\text{Na}_2$   | 24.15                     | 36   | 23.8939                   | -0.2561                         | {NaK-K <sub>2</sub> }                    |                           |                                 |      |
| $\text{K}_2$    | 21.7123537                | 37   | 21.3988                   | -0.3135                         | {NaK-Na <sub>2</sub> }                   | 20.81                     | -0.90                           | 18   |
|                 |                           |      | 22.1035                   | 0.3912                          | {KCs-Cs <sub>2</sub> }                   | 21.61(exp)                | -0.10                           | 71   |
| $\text{Cs}_2$   | 11.6336                   | 38   | 11.8387                   | 0.2051                          | {KCs-K <sub>2</sub> }                    |                           |                                 |      |
| $a^3\Sigma^+$   |                           |      |                           |                                 |                                          |                           |                                 |      |
| $\text{LiK}$    | 44.2(±1.5)                | 39   | 43.3148                   | -0.8852                         | {Li <sub>2</sub> +NaK-Na <sub>2</sub> }  |                           |                                 |      |
|                 |                           |      | 43.7083                   | -0.4917                         | {Li <sub>2</sub> +K <sub>2</sub> }       |                           |                                 |      |
|                 |                           |      | 44.1903                   | -0.0097                         | {Li <sub>2</sub> +KCs-Cs <sub>2</sub> }  |                           |                                 |      |
| $\text{LiRb}$   | 40.13(theor.)             | 51   | 38.7381                   | -1.3919                         | {Li <sub>2</sub> +KRb*-K <sub>2</sub> }  | 41.2                      | 1.07                            | 57   |
| $\text{NaK}$    | 23.0099                   | 40   | 22.1769                   | -0.8330                         | {NaRb+K <sub>2</sub> -KRb*}              |                           |                                 |      |
|                 |                           |      | 23.1528                   | 0.1429                          | {Na <sub>2</sub> +K <sub>2</sub> }       | 22.65                     | -0.36                           | 18   |
|                 |                           |      | 23.3261                   | 0.3162                          | {Na <sub>2</sub> +KCs-Cs <sub>2</sub> }  | 22.63                     | -0.38                           | 72   |
| $\text{NaRb}$   | 18.859                    | 41   | 19.7156                   | 0.8566                          | {Na <sub>2</sub> +KRb*-NaK}              | 15.3                      | -3.56                           | 57   |
|                 |                           |      | 19.4965                   | 0.6375                          | {NaK+KRb*-K <sub>2</sub> }               |                           |                                 |      |
|                 |                           |      | 19.6051                   | 0.7461                          | {Na <sub>2</sub> +KRb*-K <sub>2</sub> }  |                           |                                 |      |
| $\text{KRb}$    | 17.4(theor.)              | 54   | 16.7367                   | -0.6633                         | {K <sub>2</sub> +NaRb-NaK}               |                           |                                 |      |
|                 |                           |      | 17.9151                   | 0.5151                          | {K <sub>2</sub> +LiRb*-Li <sub>2</sub> } |                           |                                 |      |
| $\text{KCs}$    | 17.52                     | 34   | 17.3673                   | -0.1527                         | {K <sub>2</sub> +Cs <sub>2</sub> }       | 17.6                      | 0.08                            | 55   |
|                 |                           |      | 17.2418                   | -0.2782                         | {Cs <sub>2</sub> +NaK-Na <sub>2</sub> }  | 16.5                      | -1.02                           | 58   |
|                 |                           |      |                           |                                 |                                          | 16.0                      | -1.52                           | 55   |
|                 |                           |      |                           |                                 |                                          | 15.91                     | -1.61                           | 52   |

\* $\omega_e$  from theoretical results: LiRb( Ref. 51); KRb(Ref.54).

Table S2. continued.

| $b^3\Pi_u$      | Experiments               |     | Present work              |                                 |                                                       | <i>ab initio</i>          |                                 |      |
|-----------------|---------------------------|-----|---------------------------|---------------------------------|-------------------------------------------------------|---------------------------|---------------------------------|------|
|                 | $\omega_e/\text{cm}^{-1}$ | Ref | $\omega_e/\text{cm}^{-1}$ | $\delta\omega_e/\text{cm}^{-1}$ | Scheme                                                | $\omega_e/\text{cm}^{-1}$ | $\delta\omega_e/\text{cm}^{-1}$ | Ref. |
| Na <sub>2</sub> | 154.236                   | 42  | 159.6069                  | 5.3709                          | {NaK-K <sub>2</sub> }                                 |                           |                                 |      |
| K <sub>2</sub>  | 91.54                     | 43  | 93.1481                   | 1.6081                          | {KCs-Cs <sub>2</sub> }                                | 94.80                     | 3.26                            | 18   |
| Rb <sub>2</sub> | 60.1                      | 44  | 59.5688                   | -0.5312                         | {RbCs-Cs <sub>2</sub> }                               |                           |                                 |      |
| Cs <sub>2</sub> | 42.6524                   | 45  | 42.3544                   | -0.2980                         | {RbCs-Rb <sub>2</sub> }                               | 43.133                    | 0.48                            | 45   |
|                 |                           |     | 43.2035                   | 0.5511                          | {KCs-K <sub>2</sub> }                                 |                           |                                 |      |
| $b^3\Pi$        |                           |     |                           |                                 |                                                       |                           |                                 |      |
| NaK             | 120.41                    | 46  | 118.9115                  | -1.4985                         | {K <sub>2</sub> +Na <sub>2</sub> }                    | 121.71                    | 1.30                            | 18   |
|                 |                           |     | 120.2066                  | -0.2034                         | {Na <sub>2</sub> +KCs-Cs <sub>2</sub> }               | 120.06                    | -0.35                           | 59   |
| KCs             | 68.4                      | 47  | 67.6263                   | -0.7737                         | {K <sub>2</sub> +RbCs-Rb <sub>2</sub> }               | 71.55                     | 3.15                            | 52   |
|                 |                           |     | 67.9001                   | -0.4999                         | {K <sub>2</sub> +Cs <sub>2</sub> }                    |                           |                                 |      |
|                 |                           |     | 68.4780                   | 0.0780                          | {Cs <sub>2</sub> +NaK-Na <sub>2</sub> }               | 68.84                     | 0.44                            | 55   |
| RbCs            | 50.883                    | 48  | 51.4494                   | 0.5664                          | {Rb <sub>2</sub> +KCs-K <sub>2</sub> }                | 53.05                     | 2.17                            | 56   |
|                 |                           |     | 51.0835                   | 0.2005                          | {Rb <sub>2</sub> +Cs <sub>2</sub> }                   |                           |                                 |      |
| $A^1\Sigma_u^+$ |                           |     |                           |                                 |                                                       |                           |                                 |      |
| Li <sub>2</sub> | 255.4771                  | 60  | 260.2155                  | 4.7384                          | {LiNa-Na <sub>2</sub> }                               |                           |                                 |      |
| Na <sub>2</sub> | 117.3881                  | 42  | 118.8815                  | 1.4934                          | {LiNa-Li <sub>2</sub> }                               |                           |                                 |      |
| $A^1\Sigma^+$   |                           |     |                           |                                 |                                                       |                           |                                 |      |
| LiNa            | 188.0328                  | 61  | 186.6403                  | -1.3925                         | {Li <sub>2</sub> +Na <sub>2</sub> }                   |                           |                                 |      |
| LiK             | 137.0821                  | 66  | 139.3691                  | 2.2870                          | {Li <sub>2</sub> +KCs-Cs <sub>2</sub> <sup>#</sup> }  |                           |                                 |      |
| NaRb            | 65.7                      | 67  | 67.8023                   | 2.1023                          | {Na <sub>2</sub> +RbCs-Cs <sub>2</sub> <sup>#</sup> } | 63.51                     | -2.19                           | 67   |
|                 |                           |     |                           |                                 |                                                       | 77.1                      | 11.4                            | 67   |
| KCs             | 49.8                      | 47  | 49.2666                   | -0.5333                         | {Cs <sub>2</sub> <sup>#</sup> +LiK-Li <sub>2</sub> }  | 50.30                     | 0.50                            | 52   |
|                 |                           |     |                           |                                 |                                                       | 48.30                     | -1.5                            | 55   |
| RbCs            | 34.98                     | 48  | 34.1441                   | -0.8359                         | {Cs <sub>2</sub> <sup>#</sup> +NaRb-Na <sub>2</sub> } |                           |                                 |      |

<sup>#</sup>  $\omega_e$  (33.0055 cm<sup>-1</sup>) from Ref. 45.

**Figure S1**

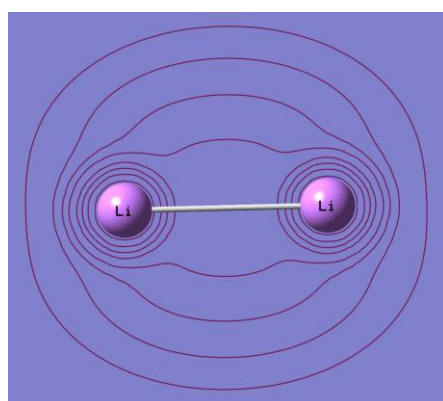

**(a) Li<sub>2</sub>**

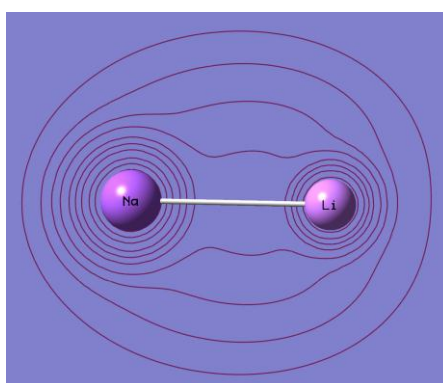

**(b) LiNa**

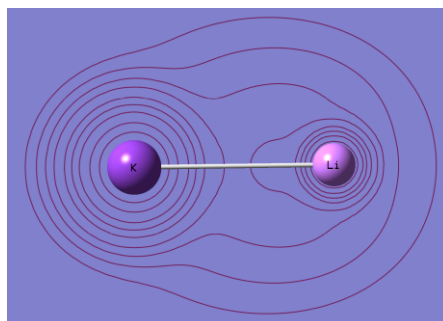

**(c) LiK**

**Figure S1.** Total electronic densities in the ground states of (a). Li<sub>2</sub>; (b). LiNa; and (c). LiK molecules. The data are calculated using the *Gaussian 03* package<sup>73</sup> at Hartree-Fock/6-311++g(3df,3dp) level. Parameters are the same for different molecules. Resolution=0.1 Å and full density matrixes are used.

The information on the distribution of electronic densities in the ground states of Li<sub>2</sub>, LiNa, and LiK presented in Figure S1 show that the total electronic density around the Li atom in Li<sub>2</sub> is more close to that in LiNa than in LiK. Comparing with the data in Figure 3 in the text, it is clear that the similarity in chemical environment of related atoms in the relevant molecules is important for the two-molecule schemes to produce reliable results.

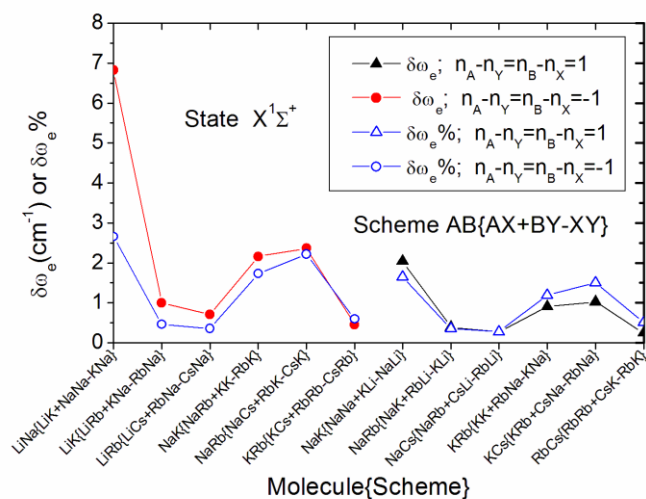

**Figure S2** Errors from the AB{AX+BY-XY} schemes with  $(n_B-n_X) \times (n_A-n_Y) = -1$ . All the errors are less than zero in this figure.

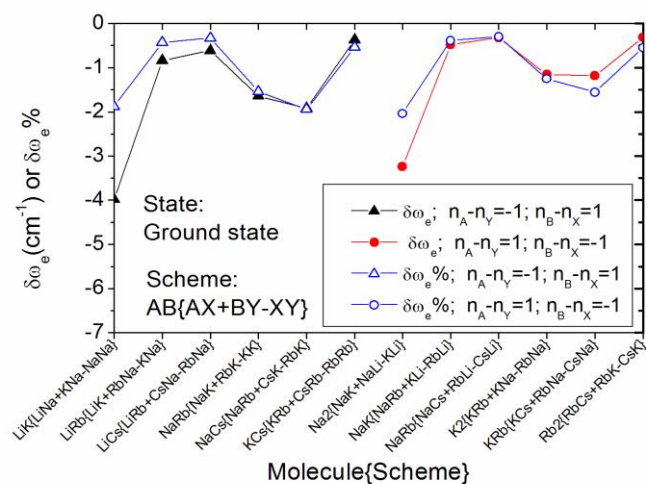

**Figure S3** Errors from the AB{AX+BY-XY} schemes with  $(n_B-n_X) \times (n_A-n_Y) = 1$ . All the errors are greater than zero in this figure.

From Figures S2-S3 it is clear that the sign of the error from the AB{AX+BY-XY} schemes is the same as the sign of  $(n_B-n_X) \times (n_A-n_Y)$ .

**Table S3** Harmonic frequencies from the AB{AX+BY-XY} and the AB{A<sub>2</sub>+BC-C<sub>2</sub>} schemes for some sets of the ground-state molecules.\*

|      | $\omega_{e,obs./cm^{-1}}$ | Refs | $\omega_{e,calc./cm^{-1}}$ | $\omega_{e,calc.}-\omega_{e,obs./cm^{-1}}$ | $\delta\omega_e\%^\#$ | Scheme/molecule set           |
|------|---------------------------|------|----------------------------|--------------------------------------------|-----------------------|-------------------------------|
|      |                           |      |                            |                                            |                       | {LiO,NaO,NaCl,LiCl}           |
| NaCl | 364.6842                  | 23   | 364.5714                   | -0.1128                                    | -0.0309               | {NaO+LiCl-LiO}                |
| LiO  | 814.64                    | 23   | 814.1981                   | -0.4419                                    | -0.0542               | {LiCl+NaO-NaCl}               |
| LiCl | 642.95453                 | 23   | 643.2152                   | 0.2607                                     | 0.0405                | {LiO+NaCl-NaO}                |
| NaO  | 492.3                     | 23   | 492.4889                   | 0.1889                                     | 0.0384                | {LiO+NaCl-LiCl}               |
|      |                           |      |                            |                                            |                       | {AlO,BiO,BiS,AlS}             |
| BiO  | 692.4                     | 24   | 692.7788                   | 0.3788                                     | 0.0547                | {AlO+BiS-AlS}                 |
| AlO  | 979.4852                  | 23   | 978.7619                   | -0.7233                                    | -0.0738               | {BiO+AlS-BiS}                 |
| AlS  | 617.1169                  | 23   | 617.3810                   | 0.2641                                     | 0.0428                | {AlO+BiS-BiO}                 |
| BiS  | 408.71                    | 24   | 408.5648                   | -0.1452                                    | -0.0355               | {AlS+BiO-AlO}                 |
|      |                           |      |                            |                                            |                       | {BH,SiH,BF,SiF}               |
| BH   | 2366.7296                 | 23   | 2366.9387                  | 0.2091                                     | 0.0088                | {SiH+BF-SiF}                  |
| SiH  | 2042.5229                 | 23   | 2042.3813                  | -0.1416                                    | -0.0069               | {BH+SiF-BF}                   |
| BF   | 1402.1587                 | 23   | 1401.8306                  | -0.3281                                    | -0.0234               | {BH+SiF-SiH}                  |
| SiF  | 837.32507                 | 23   | 837.4386                   | 0.1135                                     | 0.0136                | {BF+SiH-BH}                   |
|      |                           |      |                            |                                            |                       | {GaO,AlO,AlH,GaH}             |
| AlO  | 979.4852                  | 23   | 980.0529                   | 0.5677                                     | 0.0580                | {GaO+AlH-GaH}                 |
| GaH  | 1605.0                    | 17   | 1605.3793                  | 0.3793                                     | 0.0236                | {AlH+GaO-AlO}                 |
| AlH  | 1682.3747                 | 23   | 1682.0967                  | -0.2780                                    | -0.0165               | {GaH+AlO-GaO}                 |
| GaO  | 767.5                     | 24   | 767.1474                   | -0.3526                                    | -0.0459               | {AlO+GaH-AlH}                 |
|      |                           |      |                            |                                            |                       | {HF,CuF,CuO,OH}               |
| CuF  | 622.65                    | 24   | 622.4949                   | -0.1551                                    | -0.0249               | {HF+CuO-OH}                   |
| OH   | 3737.761                  | 23   | 3735.5828                  | -2.1782                                    | -0.0583               | {HF+CuO-CuF}                  |
| HF   | 4138.4                    | 23   | 4141.3901                  | 2.9901                                     | 0.0723                | {OH+CuF-CuO}                  |
| CuO  | 640.17                    | 24   | 640.3174                   | 0.1474                                     | 0.0230                | {OH+CuF-HF}                   |
|      |                           |      |                            |                                            |                       | {KF,CsF,KBr,CsBr}             |
| CsBr | 149.66                    | 24   | 149.6699                   | 0.0099                                     | 0.0066                | {KBr+CsF-KF}                  |
| KBr  | 213.0                     | 24   | 212.9850                   | -0.0150                                    | -0.0070               | {KF+CsBr-CsF}                 |
| CsF  | 352.56                    | 24   | 352.5167                   | -0.0433                                    | -0.0123               | {KF+CsBr-KBr}                 |
| KF   | 428.0                     | 24   | 428.0595                   | 0.0595                                     | 0.0139                | {CsF+KBr-CsBr}                |
|      |                           |      |                            |                                            |                       | {BrNa+RbCl-NaCl}              |
| RbBr | 169.46                    | 24   | 169.593                    | 0.13                                       | 0.08                  | {ClNa+RbBr-NaBr}              |
| RbCl | 228                       | 24   | 227.8043                   | -0.20                                      | -0.09                 | {NaCl+BrRb-ClRb}              |
| NaBr | 302.1                     | 24   | 301.7728                   | -0.33                                      | -0.11                 | {NaBr+ClRb-BrRb}              |
| NaCl | 364.6842                  | 23   | 365.1342                   | 0.45                                       | 0.12                  | {BaBr,SrBr,BaI,SrI}           |
|      |                           |      |                            |                                            |                       | {SrBr+BaI-SrI}                |
| BaBr | 193.8                     | 24   | 193.8626                   | 0.0626                                     | 0.0323                | {BaBr+SrI-BaI}                |
| SrBr | 216.5                     | 24   | 216.4277                   | -0.0723                                    | -0.0334               | {SrBr+BaI-BaBr}               |
| SrI  | 174.1                     | 24   | 174.1470                   | 0.0470                                     | 0.0270                | {SrI+BaBr-SrBr}               |
| BaI  | 152.30                    | 24   | 152.2600                   | -0.0400                                    | -0.0263               | {SrI+BaBr-SrBr}               |
|      |                           |      |                            |                                            |                       | {HI,HAu,Au <sub>2</sub> ,AuI} |

|                 |           |    |           |         |         |                                         |
|-----------------|-----------|----|-----------|---------|---------|-----------------------------------------|
| HAu             | 2305.5008 | 70 | 2303.7743 | -1.7265 | -0.0749 | {HI+Au <sub>2</sub> -AuI}               |
| HI              | 2309.0    | 24 | 2310.7335 | 1.7335  | 0.0751  | {HAu+AuI-Au <sub>2</sub> }              |
| AuI             | 215.77    | 74 | 215.6610  | -0.1090 | -0.0505 | {HI+Au <sub>2</sub> -HAu}               |
| Au <sub>2</sub> | 190.9     | 10 | 190.9964  | 0.0964  | 0.0505  | {AuI+AuH-HI}                            |
|                 |           |    |           |         |         | AB{A <sub>2</sub> +BC-C <sub>2</sub> }  |
| NH              | 3282.72   | 23 | 3282.6816 | -0.0384 | -0.0012 | {N <sub>2</sub> +PtH-Pt <sub>2</sub> }  |
| PtH             | 2294.68   | 24 | 2294.6940 | 0.0140  | 0.0006  | {Pt <sub>2</sub> +NH-N <sub>2</sub> }   |
|                 |           |    |           |         |         |                                         |
| CuBr            | 314.8     | 24 | 314.7690  | -0.0310 | -0.0098 | {Br <sub>2</sub> +CuI-I <sub>2</sub> }  |
| CuI             | 264.5     | 24 | 264.5221  | 0.0221  | 0.0084  | {I <sub>2</sub> +CuBr-Br <sub>2</sub> } |
|                 |           |    |           |         |         |                                         |
| BO              | 1885.286  | 23 | 1884.0912 | -1.1948 | -0.0634 | {B <sub>2</sub> +ZrO-Zr <sub>2</sub> }  |
| OZr             | 969.7     | 24 | 968.9790  | -0.7210 | -0.0743 | {Zr <sub>2</sub> +BO-B <sub>2</sub> }   |
|                 |           |    |           |         |         |                                         |
| VO              | 1011.0    | 24 | 1010.2841 | -0.7159 | -0.0708 | {V <sub>2</sub> +VO-W <sub>2</sub> }    |
| WO              | 1059.9    | 24 | 1060.9334 | 1.0334  | 0.0975  | {W <sub>2</sub> +VO-V <sub>2</sub> }    |
|                 |           |    |           |         |         |                                         |
| BiSb            | 220.0     | 24 | 219.9625  | -0.0375 | -0.0171 | {Sb <sub>2</sub> +BiF-F <sub>2</sub> }  |
| BiF             | 511.0     | 17 | 511.1070  | 0.1070  | 0.0209  | {F <sub>2</sub> +BiSb-Sb <sub>2</sub> } |

\* The experimental harmonic frequencies of the homonuclear molecules used in the AB{A<sub>2</sub>+BC-C<sub>2</sub>}

schemes are taken from refs.23 and 10, otherwise 24.



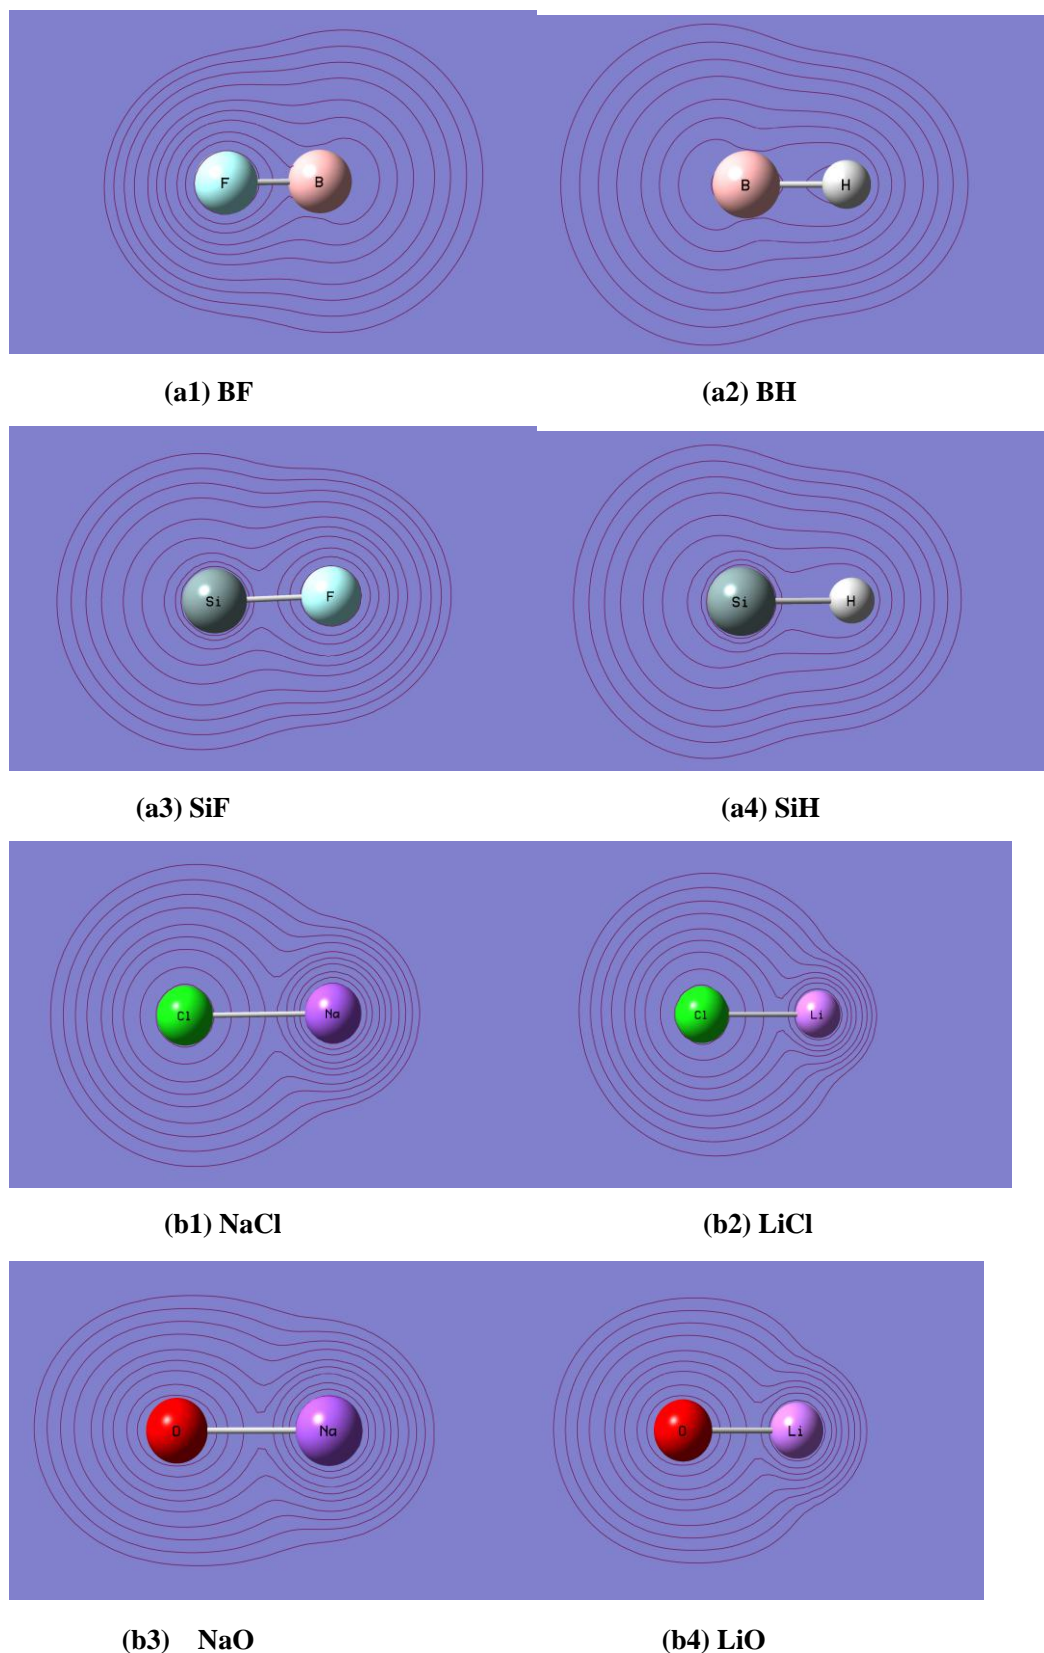

**Figure S4** Total electronic densities in the ground states of molecules in (a) {BH, SiH, BF, SiF} and (b) {LiO, LiCl, NaO, NaCl} sets: (a1) BF; (a2) BH; (a3) SiF; (a4) SiH; (b1) NaCl; (b2) LiCl; (b3) NaO; (b4) LiO. The data are calculated using the *Gaussian 03* package<sup>73</sup> at the B3LYP/6-311++g(3df,3dp) level. Resolution=0.1 Å. Parameters are the same for different molecules. Full density matrixes are used.

## Section S1 Results for molecules from groups IIA & VIA

Different schemes are tested for molecules such as BeO, BeS, MgO, MgS, CaO, CaS, SrO, SrS, BaO, and BaS. For MgO, the {Mg<sub>2</sub>+O<sub>2</sub>}, {Mg<sub>2</sub>+CaO-Ca<sub>2</sub>}, {MgS+O<sub>2</sub>-S<sub>2</sub>}, {MgS+BeO-BeS}, and the {MgS+CaO-CaS} schemes are compared. The corresponding schemes and results for all these molecules are presented in Table S4. For the ground state of MgO, the errors of the  $\omega_e$  show that the {MgS+CaO-CaS} scheme can provide acceptable data ( $\delta\omega_e\%=2.5\%$ ). While the schemes involve van de Waals molecules such as Mg<sub>2</sub> and Ca<sub>2</sub> give results with larger errors ( $\sim 90\%$ ). According to classical mechanics, all the schemes should produce the same results. The different results from different schemes demonstrate that quantum effects produce different force constants for the same atom in different molecules. As an atom in a van de Waals molecule, the force constant of Mg in Mg<sub>2</sub> is very small, and is far less than  $k_{\text{Mg}}$  in MgO. That is why the {Mg<sub>2</sub>+O<sub>2</sub>} scheme produces a result far less than the experimental data. The results of the {MgS+CaO-CaS} scheme provide supporting that the  $k_{\text{Mg}}$  in MgO and MgS are nearly the same, and the  $k_{\text{O}}$  in MgO and CaO are similar to each other. Similar reasons can be adopted to explain results from other schemes. This result indicates that the spring constant for an atom is related with the chemical bond of the molecule. For a given atom, to obtain a better prediction of the  $\omega_e$  to other molecules, the chemical bond in one molecule should be similar to the one in the other molecule to be predicted.

For a given scheme, such as the AB{AX+BY-XY} scheme, there are some sets of molecules, such as {BaO, SrO, BaS, SrS}, in which the harmonic frequency of one molecule can be obtained from those of the other three molecules. The errors for the molecules in the same set are similar to each other. For example, in the {MgO,<sup>23</sup> MgS,<sup>23</sup> CaO,<sup>24</sup> CaS<sup>24</sup>} set, the relative errors MgO, CaO, MgS and CaS are 2.5%, -2.4%, -1.5%, and 1.6%, respectively. In the {BaO,<sup>24</sup> SrO,<sup>62</sup> BaS,<sup>64</sup> SrS<sup>63</sup>} set, the relative errors SrO, BaO, SrS and BaS are 0.68%, -0.74%, -0.41%, and 0.44%, respectively.

**Table S4 Harmonic frequencies obtained from theory of atomic spring constants for the  $X^1\Sigma^+$  states of BeO, BeS, MgO, MgS, CaO, CaS, SrO, SrS, BaO, and BaS.**

| Molecule {Scheme}            | $\omega_{e,obs.}/\text{cm}^{-1}$ | Ref. | $\omega_{e,calc.}/\text{cm}^{-1}$ | $\omega_{e,calc.}-\omega_{e,obs.}/\text{cm}^{-1}$ | $\delta\omega_e\%^\#$ |
|------------------------------|----------------------------------|------|-----------------------------------|---------------------------------------------------|-----------------------|
| BeO {BeS+SO-S <sub>2</sub> } | 1487.3200                        | 23   | 1352.2236                         | -135.0964                                         | -9.08%                |
| BeS {BeO+S <sub>2</sub> -SO} | 997.9400                         | 23   | 1060.9146                         | 62.9746                                           | 6.31%                 |
| {BeO,BeS,MgO,MgS} set:       |                                  |      |                                   |                                                   |                       |
| BeO {BeS+MgO-MgS}            | 1487.32                          | 23   | 1847.3310                         | 360.0110                                          | 24.21%                |
| BeS {BeO+MgS-MgO}            | 997.94                           | 23   | 913.5988                          | -84.3412                                          | -8.45%                |
| MgO {BeO+MgS-BeS}            | 785.2183                         | 23   | 728.0463                          | -57.1720                                          | -7.28%                |
| MgS {MgO+BeS-BeO}            | 528.74                           | 23   | 559.1131                          | 30.3731                                           | 5.74%                 |
| {MgO,MgS,CaO,CaS} set:       |                                  |      |                                   |                                                   |                       |
| MgO {MgS+CaO-CaS}            | 785.2183                         | 23   | 804.9457                          | 19.7274                                           | 2.51%                 |
| CaO {MgO+CaS-MgS}            | 732.10                           | 24   | 714.4225                          | -17.6775                                          | -2.41%                |
| MgS {MgO+CaS-CaO}            | 528.74                           | 23   | 520.6415                          | -8.0985                                           | -1.53%                |
| CaS {MgS+CaO-MgO}            | 462.23                           | 24   | 469.5787                          | 7.3487                                            | 1.59%                 |
| {MgO,SrO,MgS,SrS} set:       |                                  |      |                                   |                                                   |                       |
| MgO {SrO+MgS-SrS}            | 785.2183                         | 23   | 830.1899                          | 44.9716                                           | 5.73%                 |
| SrO {MgO+SrS-MgS}            | 653.3083                         | 62   | 622.0852                          | -31.2232                                          | -4.78%                |
| MgS {MgO+SrS-SrO}            | 528.7400                         | 23   | 511.5692                          | -17.1708                                          | -3.25%                |
| SrS {MgS+SrO-MgO}            | 388.2643                         | 63   | 401.0974                          | 12.8331                                           | 3.31%                 |
| {CaO,BaO,CaS,BaS} set:       |                                  |      |                                   |                                                   |                       |
| CaO {BaO+CaS-BaS}            | 732.1000                         | 24   | 760.5091                          | 28.4091                                           | 3.88%                 |
| BaO {CaO+BaS-CaS}            | 669.7600                         | 24   | 645.3766                          | -24.3834                                          | -3.64%                |
| CaS {BaS+CaO-BaO}            | 462.2300                         | 24   | 452.0721                          | -10.1579                                          | -2.20%                |
| BaS {CaS+BaO-CaO}            | 379.3828                         | 64   | 388.1644                          | 8.7816                                            | 2.31%                 |
| {CaO,SrO,CaS,SrS} set:       |                                  |      |                                   |                                                   |                       |
| CaO {SrO+CaS-SrS}            | 732.1000                         | 24   | 754.6920                          | 22.5920                                           | 3.09%                 |
| SrO {CaO+SrS-CaS}            | 653.3083                         | 62   | 635.8591                          | -17.4492                                          | -2.67%                |
| CaS {SrS+CaO-SrO}            | 462.2300                         | 24   | 454.0063                          | -8.2237                                           | -1.78%                |
| SrS {CaS+SrO-CaO}            | 388.2643                         | 63   | 395.0472                          | 6.7829                                            | 1.75%                 |
| {SrO,BaO,SrS,BaS} set:       |                                  |      |                                   |                                                   |                       |
| SrO {BaO+SrS-BaS}            | 653.3083                         | 62   | 657.7731                          | 4.4647                                            | 0.68%                 |
| BaO {SrO+BaS-SrS}            | 669.7600                         | 24   | 664.7731                          | -4.9869                                           | -0.74%                |
| SrS {BaS+SrO-BaO}            | 388.2643                         | 63   | 386.6671                          | -1.5972                                           | -0.41%                |
| BaS {SrS+BaO-SrO}            | 379.3828                         | 64   | 381.0536                          | 1.6708                                            | 0.44%                 |

$\# \delta\omega_e\% = 100\%(\omega_{e,calc.}-\omega_{e,obs.})/\omega_{e,obs.}$ . The observed data are taken from Ref.23 for O<sub>2</sub>, S<sub>2</sub>, Mg<sub>2</sub>, and Ref.24 for Ca<sub>2</sub>.

## Section S2 Results for group IB molecules

For the groups IB atoms, results from their diatomic molecules and their hydrides are compared in Figure S5. The results show that the Cu, Ag, Au, and H compounds can provide reliable force constants and  $\omega_e$  from the present approach. Though H is not belong to group IB, and the mass of H is different much to those of the IB atoms, it can be used to produce better harmonic frequencies from its spring constant. The errors for CuH, AgH, and AuH from the AB{A<sub>2</sub>+B<sub>2</sub>} scheme are about 3%. Despite of the difference in the masses of H and Au, there are similar in the electronic configurations (one electron in the outmost shell) and the electronegativities. Their electronegativities are 2.4, 1.9, 1.9, and 2.1 for Au, Ag, Cu, and H respectively.<sup>8</sup> The results for molecules from same groups also demonstrate that atoms with similar electronegativities produce accurate data easily from both the AB{A<sub>2</sub>+B<sub>2</sub>} and the AB{AX+BY-XY} schemes.

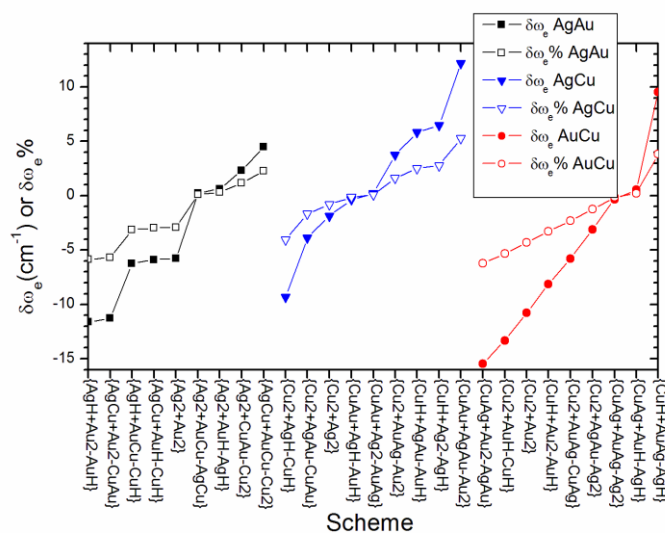

**Figure S5** Errors for AuCu, AgCu, and AgAu from molecules of Group IB atoms and their hydrides. The experimental  $\omega_e$  are from ref.68 for CuH, AuH, and AgH; ref.65 for AgAu; ref.24 for AuCu, AgCu; and ref.10 for Cu<sub>2</sub>, Ag<sub>2</sub>, and Au<sub>2</sub>.

### References

- 66 A. Grochola, J. Szczepkowski, W. Jastrzebski, P. Kowalczyk, *Chem. Phys. Lett.* **2012**, 535, 17-20.
- 67 M. Tamanis, R. Ferber, A. Zaitsevskii, E. A. Pazyuk, A. V. Stolyarov, H. Chen, J. Qi, H. Wang, W. C. Stwalley, *J. Chem. Phys.* **2002**, 117, 7980-7988.
- 68 J. Y. Seto, Z. Morbi, F. Charron, S. K. Lee, P. F. Bernath, R. J. Le Roy, *J. Chem. Phys.* **1999**, 110(24), 11756-11767.
- 69 C. Amiot, J. Vergès, *J. Chem. Phys.* **2000**, 112(16), 7068-7074.
- 70 T. Leininger, H. Stoll, G. H. Jeung, *J. Chem. Phys.* **1997**, 106, 2541-2543.
- 71 E. Ahmed, A.M. Lyra, F. Xie, D. Li, Y. Chu, L. Li, V.S. Ivanov, V.B. Sovkov, S. Magnier, *J. Mol. Spectrosc.* **2005**, 234, 41-52.
- 72 S. Magnier, M. Aubert-Frécon, Ph. Millie, *J. Mol. Spectrosc.* **2000**, 200, 96-103.
- 73 M. J. Frisch, *et al. Gaussian 03, Rev.E.01*; **2004**, Gaussian, Inc.: Wallingford CT.
- 74 L.M. Reynard, C. J. Evans, M. C. L. Gerry, *J. Mol. Spectrosc.* **2001**, 205, 344-346.
